# Supplementary material
Source: MDPI journal article supplement (https://www.mdpi.com/2076-3417/11/4/1615)
Supplement: s1 [file s1]

## Supplementary material

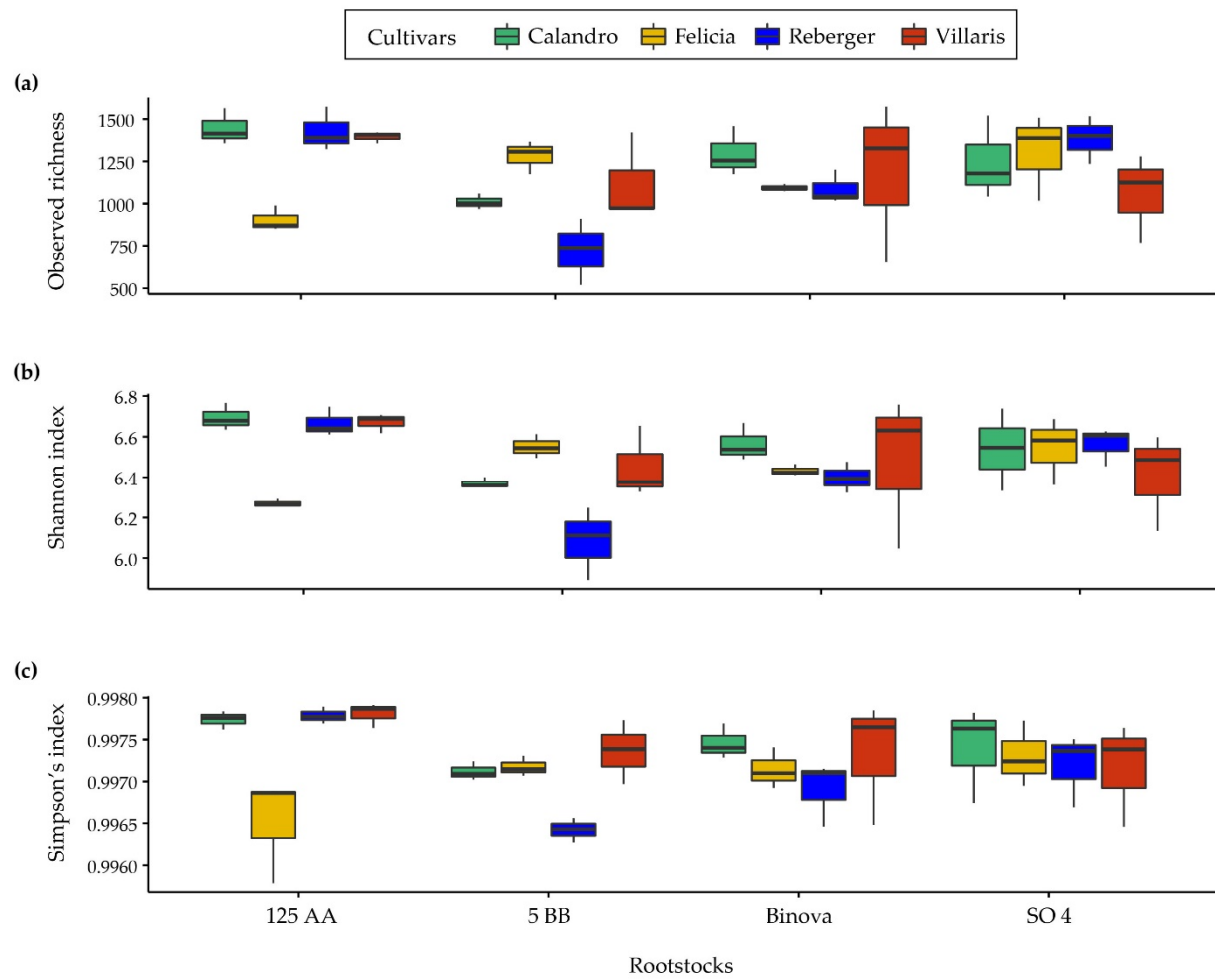

Figure S1. Observed richness (a), and Shannon (b) and Simpson (c) diversity indices of bacterial rhizosphere communities per rootstock and cultivar interaction.
